# Supplementary material for: Dental Fear Survey: A Cross-Sectional Study Evaluating the Psychometric Properties of the Brazilian Portuguese Version
Source: Hindawi journal article supplement (doi:10.1155/2014/725323), 2014-01-01
Supplement: f1 [file 725323.f1.pdf]

## Additional File 1

### The Brazilian Portuguese version of the Dental Fear Survey (DFS)

Os itens neste questionário se referem a várias situações, sentimentos e reações relacionadas com o tratamento dentário. Por favor, avalie seu sentimento ou reação com relação a estes itens fazendo um círculo ao redor do número (1, 2, 3, 4 ou 5) da categoria que melhor corresponde a sua reação.

Nome: \_\_\_\_\_ Data: \_\_\_\_/\_\_\_\_/\_\_\_\_

Sexo: Feminino ( ) Masculino ( ) Idade: \_\_\_\_\_

Profissão do Pai: \_\_\_\_\_ Profissão da Mãe: \_\_\_\_\_

Que escola cursou anteriormente? ( ) Particular ( ) Pública

Quando foi sua última visita ao dentista? ( ) 6 meses ( ) 1 ano ( ) 2 anos ( ) 3 anos ( ) outros

Qual o tipo de tratamento realizado na última visita?

( ) Exame clínico ( ) Restauração ( ) Profilaxia ( ) Extração

( ) Tratamento de canal ( ) Alívio de dor ( ) Outros

1. O medo do tratamento dentário já levou você a demorar a (adiar) marcar consulta?

|       |                   |               |                |              |
|-------|-------------------|---------------|----------------|--------------|
| 1     | 2                 | 3             | 4              | 5            |
| Nunca | Uma ou duas vezes | Algumas vezes | Frequentemente | Quase sempre |

7. Meu coração bate mais depressa

|              |          |               |       |            |
|--------------|----------|---------------|-------|------------|
| 1            | 2        | 3             | 4     | 5          |
| Nem um pouco | Um pouco | Mais ou menos | Muito | Muitíssimo |

2. O medo do tratamento dentário já levou você a cancelar uma consulta ou simplesmente não comparecer?

|       |                   |               |                |              |
|-------|-------------------|---------------|----------------|--------------|
| 1     | 2                 | 3             | 4              | 5            |
| Nunca | Uma ou duas vezes | Algumas vezes | Frequentemente | Quase sempre |

A seguir há uma lista de coisas e situações que muitas pessoas mencionam como sendo algo como ansiedade ou medo. Por favor, avalie quanto medo, ansiedade ou desprazer cada uma delas causa em você. Use os números de 1 a 5 da escala a seguir. Faça uma marca no espaço apropriado (se ajudar, tente imaginar você mesmo em cada uma destas situações e descreva qual é a sua reação habitual).

3. Quando me submeto ao tratamento dentário: meus músculos ficam tensos

|              |          |               |       |            |
|--------------|----------|---------------|-------|------------|
| 1            | 2        | 3             | 4     | 5          |
| Nem um pouco | Um pouco | Mais ou menos | Muito | Muitíssimo |

|              |          |               |       |            |
|--------------|----------|---------------|-------|------------|
| 1            | 2        | 3             | 4     | 5          |
| Nem um pouco | Um pouco | Mais ou menos | Muito | Muitíssimo |

4. O ritmo da minha respiração aumenta

|              |          |               |       |            |
|--------------|----------|---------------|-------|------------|
| 1            | 2        | 3             | 4     | 5          |
| Nem um pouco | Um pouco | Mais ou menos | Muito | Muitíssimo |

5. Eu transpiro

|              |          |               |       |            |
|--------------|----------|---------------|-------|------------|
| 1            | 2        | 3             | 4     | 5          |
| Nem um pouco | Um pouco | Mais ou menos | Muito | Muitíssimo |

6. Sinto náuseas e enjô de estômago

|              |          |               |       |            |
|--------------|----------|---------------|-------|------------|
| 1            | 2        | 3             | 4     | 5          |
| Nem um pouco | Um pouco | Mais ou menos | Muito | Muitíssimo |

8. Marcando consulta para ir ao dentista

9. Aproximando-se do consultório do dentista

10. Aguardando na sala de espera

11. Estar sentado na cadeira do dentista

12. Sentindo o cheiro do consultório

13. Vendo o dentista entrar

14. Vendo a agulha da seringa

15. Sentindo a agulha penetrar

16. Vendo a broca do motor

17. Ouvindo o motor

18. Sentindo as vibrações do motor no dente

19. Submetendo-se à limpeza dos dentes

20. Considerando todas as situações, quanto medo você sente em relação ao tratamento dentário?

|                                                                                                | 1 | 2 | 3 | 4 | 5 |
|------------------------------------------------------------------------------------------------|---|---|---|---|---|
| 8. Marcando consulta para ir ao dentista                                                       |   |   |   |   |   |
| 9. Aproximando-se do consultório do dentista                                                   |   |   |   |   |   |
| 10. Aguardando na sala de espera                                                               |   |   |   |   |   |
| 11. Estar sentado na cadeira do dentista                                                       |   |   |   |   |   |
| 12. Sentindo o cheiro do consultório                                                           |   |   |   |   |   |
| 13. Vendo o dentista entrar                                                                    |   |   |   |   |   |
| 14. Vendo a agulha da seringa                                                                  |   |   |   |   |   |
| 15. Sentindo a agulha penetrar                                                                 |   |   |   |   |   |
| 16. Vendo a broca do motor                                                                     |   |   |   |   |   |
| 17. Ouvindo o motor                                                                            |   |   |   |   |   |
| 18. Sentindo as vibrações do motor no dente                                                    |   |   |   |   |   |
| 19. Submetendo-se à limpeza dos dentes                                                         |   |   |   |   |   |
| 20. Considerando todas as situações, quanto medo você sente em relação ao tratamento dentário? |   |   |   |   |   |

Note: The DFS was previously translated and validated by Cesar et al. (1993).
